# Supplementary material for: Asymmetric autocatalysis initiated by achiral nucleic acid base adenine: implications on the origin of homochirality of biomolecules
Source: Royal Society of Chemistry journal article supplement (doi:10.1039/c2cc34928k), 2012-01-01
Supplement: c2cc34928k.pdf [file c2cc34928k.pdf]

*Electronic Supplementary Information (ESI) for:*

**Asymmetric autocatalysis initiated by achiral nucleic acid base  
adenine:  
Implications on the origin of homochirality of biomolecules**

Hiroko Mineki,<sup>a</sup> Taichi Hanasaki,<sup>a</sup> Arimasa Matsumoto,<sup>a</sup> Tsuneomi Kawasaki,<sup>\*a,b</sup> and  
Kenso Soai<sup>\*a</sup>

<sup>a</sup> *Department of Applied Chemistry, Tokyo University of Science, Kagurazaka,  
Shinjuku-ku, Tokyo, 162-8601, Japan. Fax: +81 3 5261 4631; Tel: +81 3 5228 8261;  
E-mail: [soai@rs.kagu.tus.ac.jp](mailto:soai@rs.kagu.tus.ac.jp)*

<sup>b</sup> *Present Address: Department of Materials Science and Engineering, Faculty of  
Engineering, University of Fukui. E-mail: [tk@u-fukui.ac.jp](mailto:tk@u-fukui.ac.jp)*

Contents:

1. Stirred crystallization of adeninium dinitrate **1**
  2. Single crystallization of adeninium dinitrate **1**
  3. The X-ray powder diffraction patterns of powder-like crystal **1**
  4. Typical experimental procedure for asymmetric autocatalysis
-

### 1. Stirred crystallization of adeninium dinitrate **1**

Adenine (2 g) was dissolved in 4.6 M aqueous nitric acid (140 mL) at 45 °C. The temperature was gradually lowered at room temperature with stirring. The crystals were filtered and precipitate was dried in vacuo to give the powder-like crystal of **1**.

### 2. Single crystallization of adeninium dinitrate **1**

Adenine (0.7 g) was dissolved in 4.6 M aqueous nitric acid (140 mL) at 45 °C. The single crystals of **1** were appeared, after the slow evaporation of the solvent at room temperature under ambient pressure.

### 3. The X-ray powder diffraction patterns of powder-like crystal **1**

The data were collected on a Rigaku Rint 2500 X-ray diffractometer with Cu K $\alpha$  radiation.

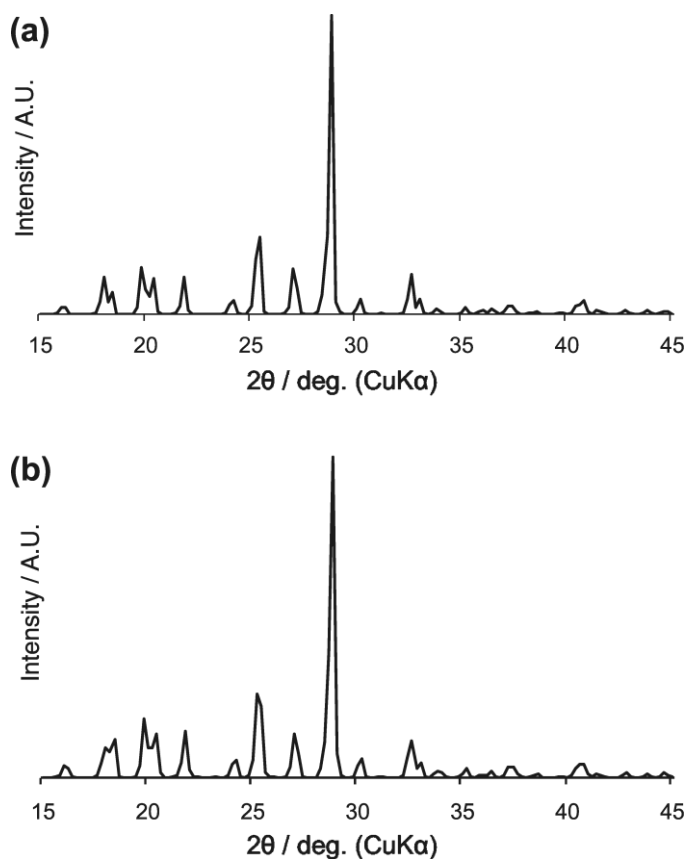

**Fig. S1.** (a) Simulated pattern from single crystal data. (b) Powder-like crystal **1** obtained from stirred crystallization (observed pattern).

4. Typical experimental procedure for asymmetric autocatalysis (Table 1, entry 2)

A crystal of adeninium dinitrate **1** was ground into a fine powder using an agate pestle and mortar. Toluene solution of *i*-Pr<sub>2</sub>Zn (0.08 mL, 0.08 mmol) was added dropwise at 0 °C with stirring to a mixture of finely powdered crystal of [CD(+)250<sub>Nujol</sub>]-**1** (19.6 mg, 0.075 mmol) and aldehyde **2** (4.7 mg, 0.025 mmol). After stirring overnight at 0 °C, toluene (0.75 mL) was added to the mixture, and then toluene solution of *i*-Pr<sub>2</sub>Zn (0.3 mL, 0.3 mmol) was added dropwise over a period of 1 h. Then, toluene (0.75 mL) solution of aldehyde **2** (18.8 mg, 0.1 mmol) was slowly added dropwise over a period of 1.5 h. After stirring for 3 h at 0 °C, toluene (5.0 mL) and toluene solution of *i*-Pr<sub>2</sub>Zn (0.8 mL, 0.8 mmol) were added successively. Then, toluene (2.0 mL) solution of **2** (75.3 mg, 0.4 mmol) was added dropwise over a period of 1.5 h and the mixture was stirred for 1 h at 0 °C. Once again, toluene (14.0 mL) and toluene solution of *i*-Pr<sub>2</sub>Zn (1.6 mL, 1.6 mmol) were added, and toluene (4.0 mL) solution of **2** (150.6 mg, 0.8 mmol) was added dropwise over a period of 1.5 h. After the mixture was stirred for 1 h at 0 °C, the reaction was quenched using a mixture of 30% aqueous ammonia and a saturated aqueous ammonium chloride (2/1, v/v) solution (10 mL). The mixture was extracted three times using ethyl acetate. The combined organic layers were dried over anhydrous sodium sulfate and evaporated in *vacuo*. Purification of the residue using silica gel column chromatography (hexane/ethyl acetate = 3/1, v/v) gave (*R*)-5-pyrimidyl alkanol **3** with 88.7% ee in 89.4% yield. The ee value was determined by HPLC using a chiral stationary phase (Daicel Chiralpak IB column (250 x 4.6 Φ mm ID), eluent = 5% 2-propanol in hexane, flow rate 1.0 mL/min, 254 nm UV detector, retention time 11.4 min for (*S*)-**3**, 15.6 min for (*R*)-**3**).
